# Supplementary material
Source: Springer Nature journal article supplement (https://www.springermedizin.de/resource/supplementary/12876_2014_1171_MOESM4_ESM.pdf/9438240)

kDa

70

55

35

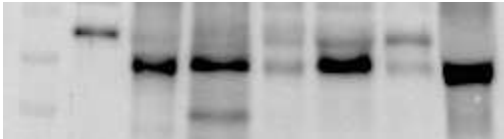

0

1

2

3

4

5

6

7

Supplement: MOESM4 [file 9438240]
